# Supplementary material
Source: ML conference proceedings conference paper supplement (https://openaccess.thecvf.com/content/ICCV_2017/html/Tsogkas_AMAT_Medial_Axis_ICCV_2017_paper.html)
Supplement: Supplementary file 2 [file Tsogkas_AMAT_Medial_Axis_ICCV_2017_supplemental.zip]

Archive with 2 entries (2 files):
- 1142-supp.pdf
- amat-demo-fast.mp4
